# Supplementary material
Source: PubMed Central journal article supplement (PMC4347236)
Supplement: JCI71882sd.pdf [file JCI71882sd.pdf]

Supplementary Fig. 1 (Li *et al.*)

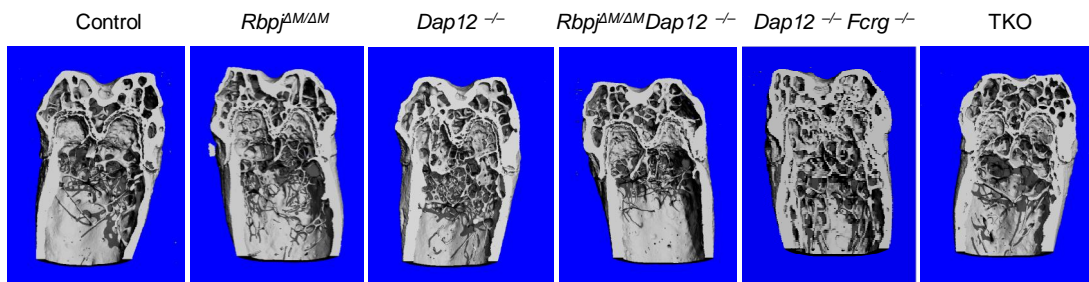

**Supplementary Figure 1** Microcomputed tomography ( $\mu$ CT) images of the distal femurs isolated from the indicated bone marrow chimeric mice. "TKO" indicates the *Rbp1<sup>ΔM/ΔM</sup>Dap12<sup>-/-</sup>Fcrg<sup>-/-</sup>* mice. Scale bar, 1mm.

Supplementary Fig. 2 (Li *et al.*)

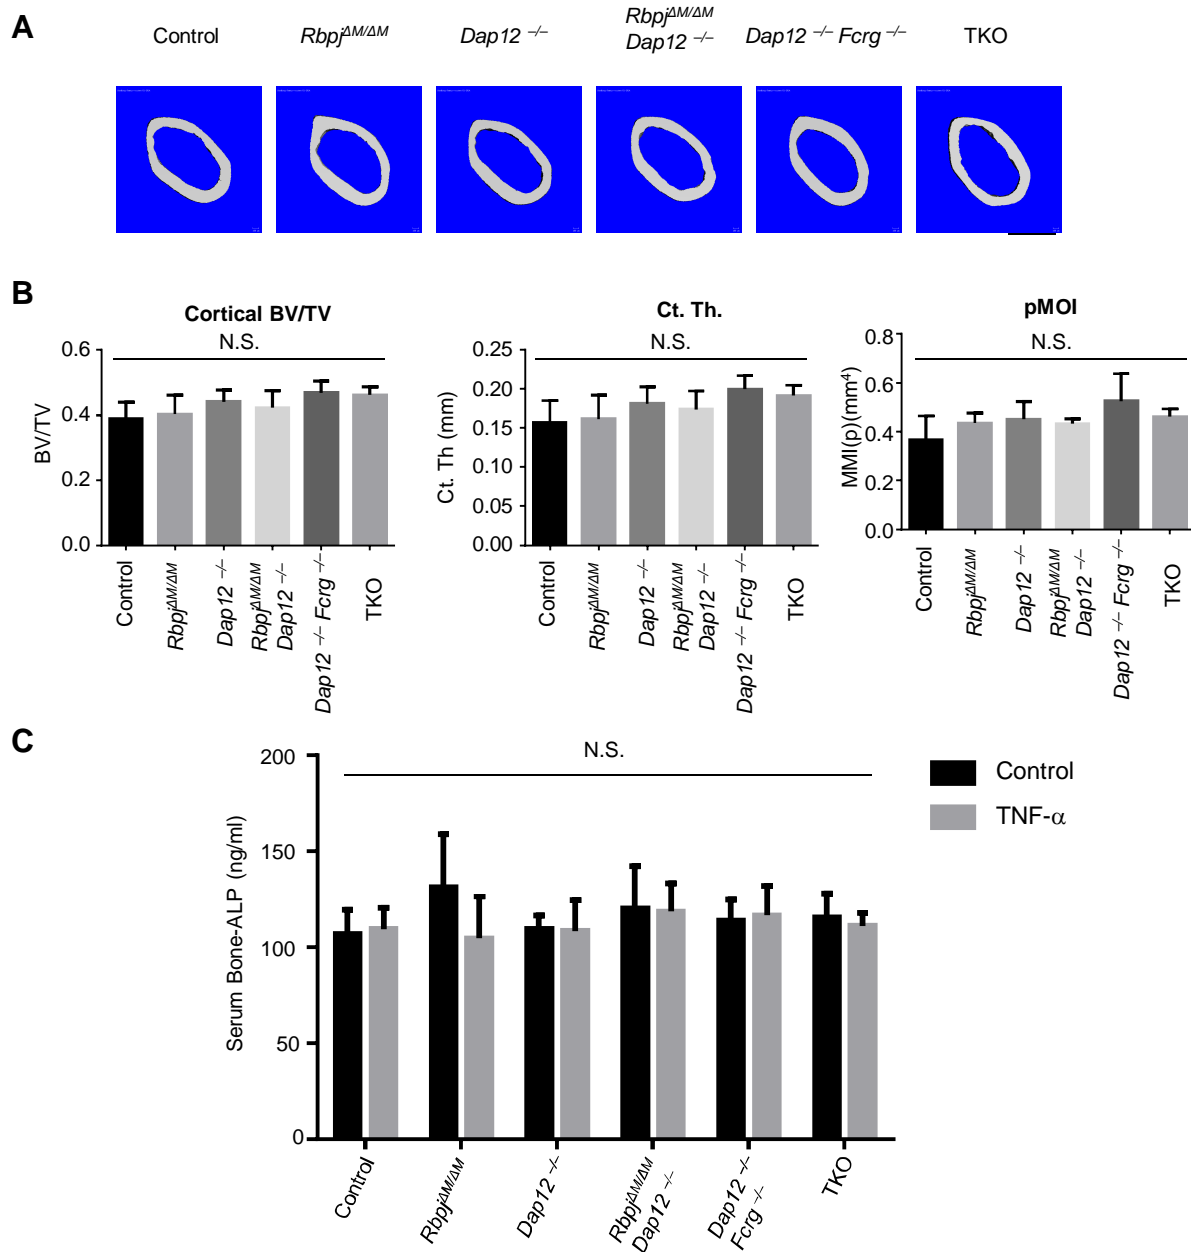

**Supplementary Figure 2 RBP-J deficiency does not significantly affect the cortical bone phenotype in the indicated mice.** (A) Microcomputed tomography ( $\mu$ CT) images of mid-trunk of the femurs isolated from the indicated bone marrow chimeric mice. "TKO" indicates the *Rbpj<sup>ΔM/ΔM</sup>Dap12<sup>-/-</sup>Fcrg<sup>-/-</sup>* mice. Scale bar, 1mm. (B) Cortical bone morphometric analysis of femurs isolated from the chimeric mice. BV/TV, bone volume per tissue volume; Ct Th., Cortical bone Thickness; pMOI, Polar Moment of Inertia;  $n=5$  per group. N.S., no statistically significant difference. (C) Concentration of serum Bone-ALP obtained from the indicated mice.  $n=5$  per group. N.S., no statistically significant difference.

Supplementary Fig. 3 (Li *et al.*)

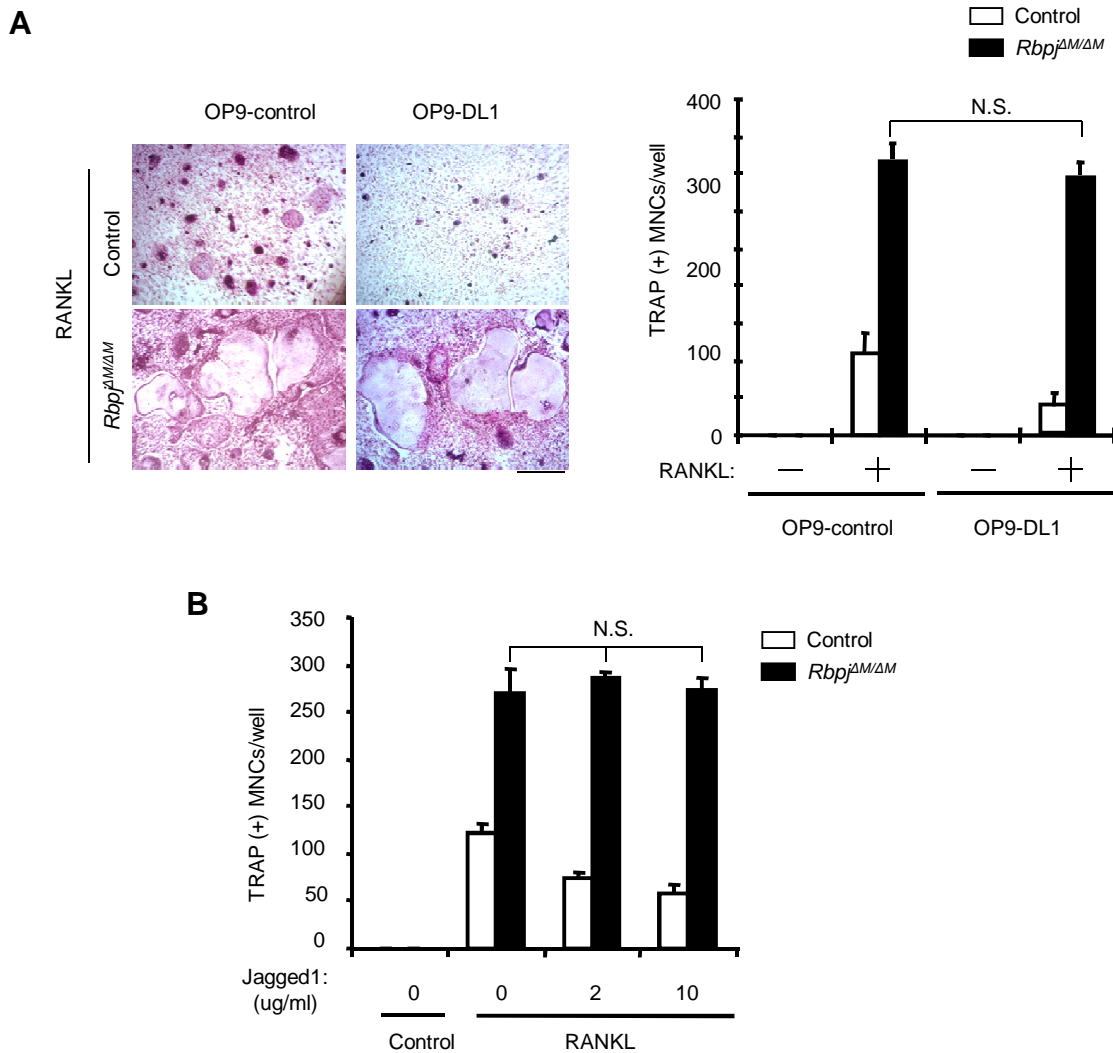

**Supplementary Figure 3 Inhibition of osteoclastogenesis by Notch signaling is RBP-J dependent.** RBP-J deficiency abolished the inhibition of osteoclastogenesis by Delta-like1 (A) or Jagged1 (B) activated Notch signaling. (A) The control or *Rbpj*<sup>ΔM/ΔM</sup> osteoclast precursors were co-cultured with Delta-like1 overexpressing OP9 cells (OP9-DL1) or the OP9 cells harboring the control vectors (OP9-control) in the present of RANKL for 5 days. Scale bar, 100μm. (B) The control or *Rbpj*<sup>ΔM/ΔM</sup> osteoclast precursors were treated without or with recombinant Jagged1 in the present of RANKL for 5 days. TRAP staining was performed and TRAP(+) MNCs cells were counted. N.S. No statistically significant difference.

## Supplementary Fig. 4 (Li *et al.*)

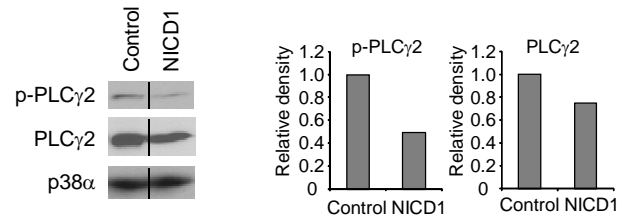

**Supplementary Figure 4 Notch-RBP-J signaling suppresses basal PLC $\gamma$ 2 expression.** NICD1 overexpression reduced the levels of phospho-PLC $\gamma$ 2 and total PLC $\gamma$ 2. Bone marrow derived macrophages were obtained from the control or *NICD1<sup>M</sup>* mice (*Rosa<sup>NICD1</sup>;LysMcre* (+)) (ref.29), in which the NICD1 is overexpressed in myeloid cells. The lanes separated by a black line indicate that they were run on the same gel but were noncontiguous. p38 $\alpha$  was measured as a loading control. The relative density of the immunoblot bands of phospho-PLC $\gamma$ 2 or total PLC $\gamma$ 2 vs. those of loading control p38 $\alpha$  were quantified by densitometry and normalized to the control condition (right panel).

Supplementary Fig. 5 (Li *et al.*)

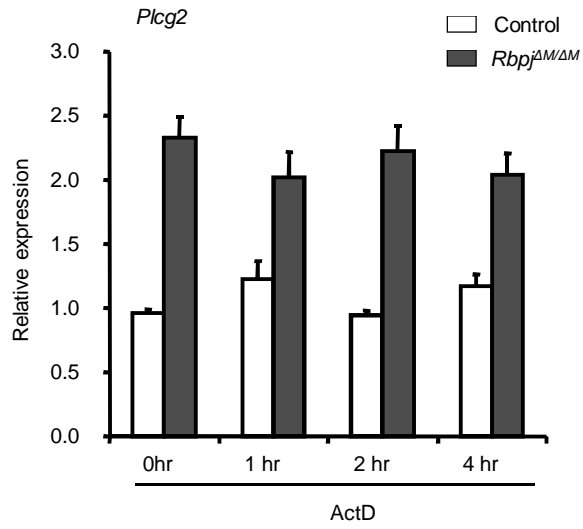

**Supplementary Figure 5 mRNA stability of *Plcg2* is not affected by RBP-J deficiency.** The control or *Rbp<sup>ΔM/ΔM</sup>* osteoclast precursors were treated with actinomycin D (5ug/ml) for the indicated times. The mRNA expression level of *Plcg2* was measured by real-time PCR.

Supplementary Fig. 6 (Li *et al.*)

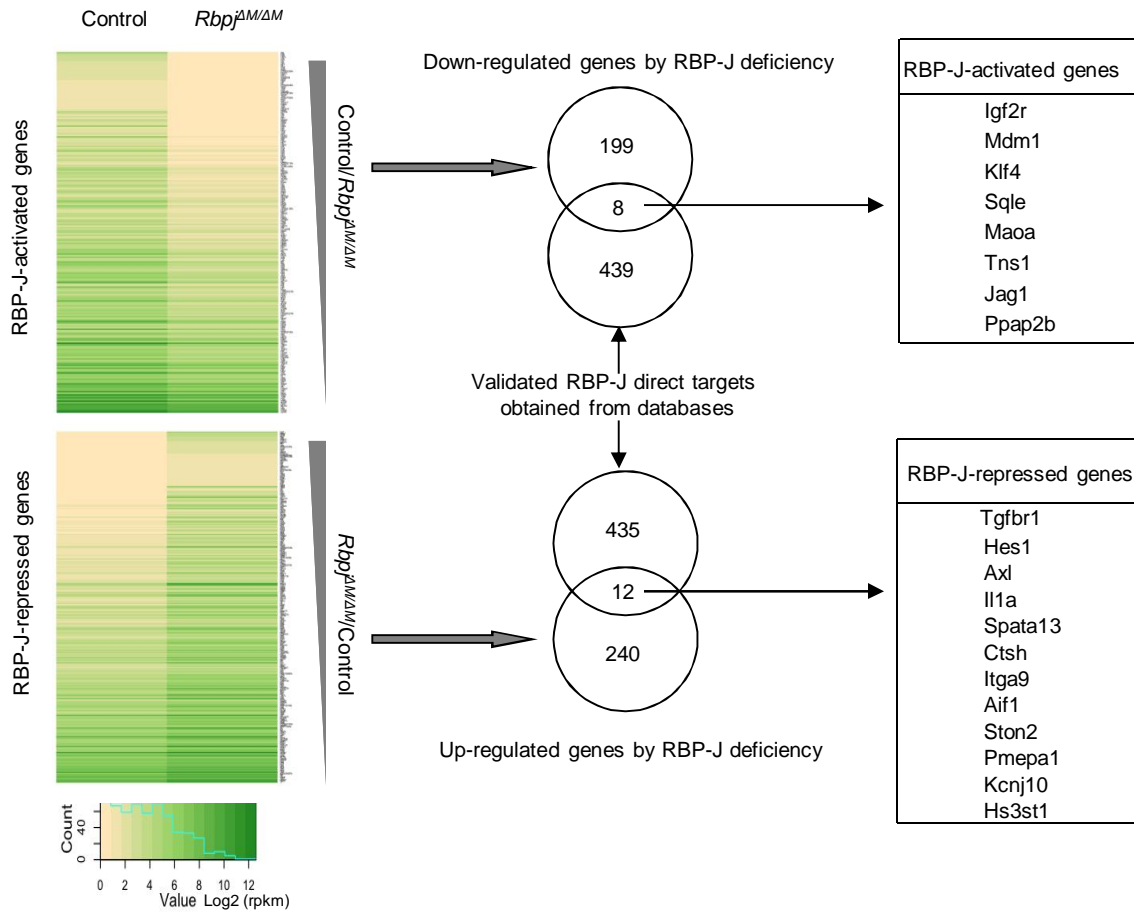

**Supplementary Figure 6 Genome wide regulation of gene expression by RBP-J in osteoclast precursors.** (Left) RNAseq-based expression heat maps of genes regulated by RBP-J deficiency. The upper panel shows the down-regulated and lower panel represents the up-regulated genes by RBP-J deficiency based on an overlap of two biological replicates of RNAseq experiments using control and *Rbpj*<sup>ΔM/ΔM</sup> osteoclast precursors. Log<sub>2</sub> values of RPKMs of a representative RNAseq experiment are shown in the heat map. Genes with log<sub>2</sub> ratios between control and *Rbpj*<sup>ΔM/ΔM</sup> cells of more than 1 fold are represented. (Middle) Venn diagrams of the overlap between differentially RBP-J regulated genes (RNAseq) and validated RBP-J direct targets obtained from published databases. (Right) Gene lists of RBP-J putative direct targets in osteoclast precursors.

Supplementary Fig. 7 (Li *et al.*)

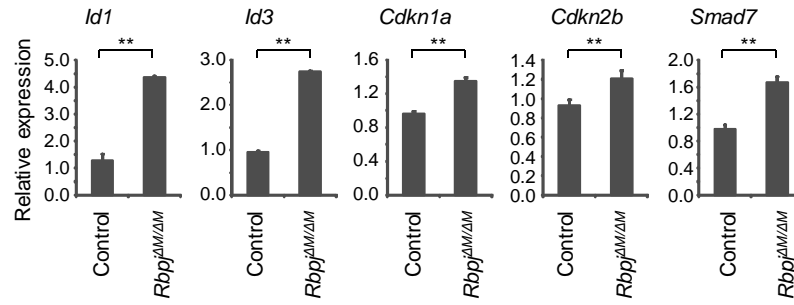

**Supplementary Figure 7 RBP-J deficiency enhances cell responsiveness to TGF- $\beta$ .** Quantitative real-time PCR analysis of mRNA expression level of TGF- $\beta$  responsive genes. Data are representative of at least 3 independent experiments. \*\* $P < 0.01$ .

Supplementary Fig. 8 (Li *et al.*)

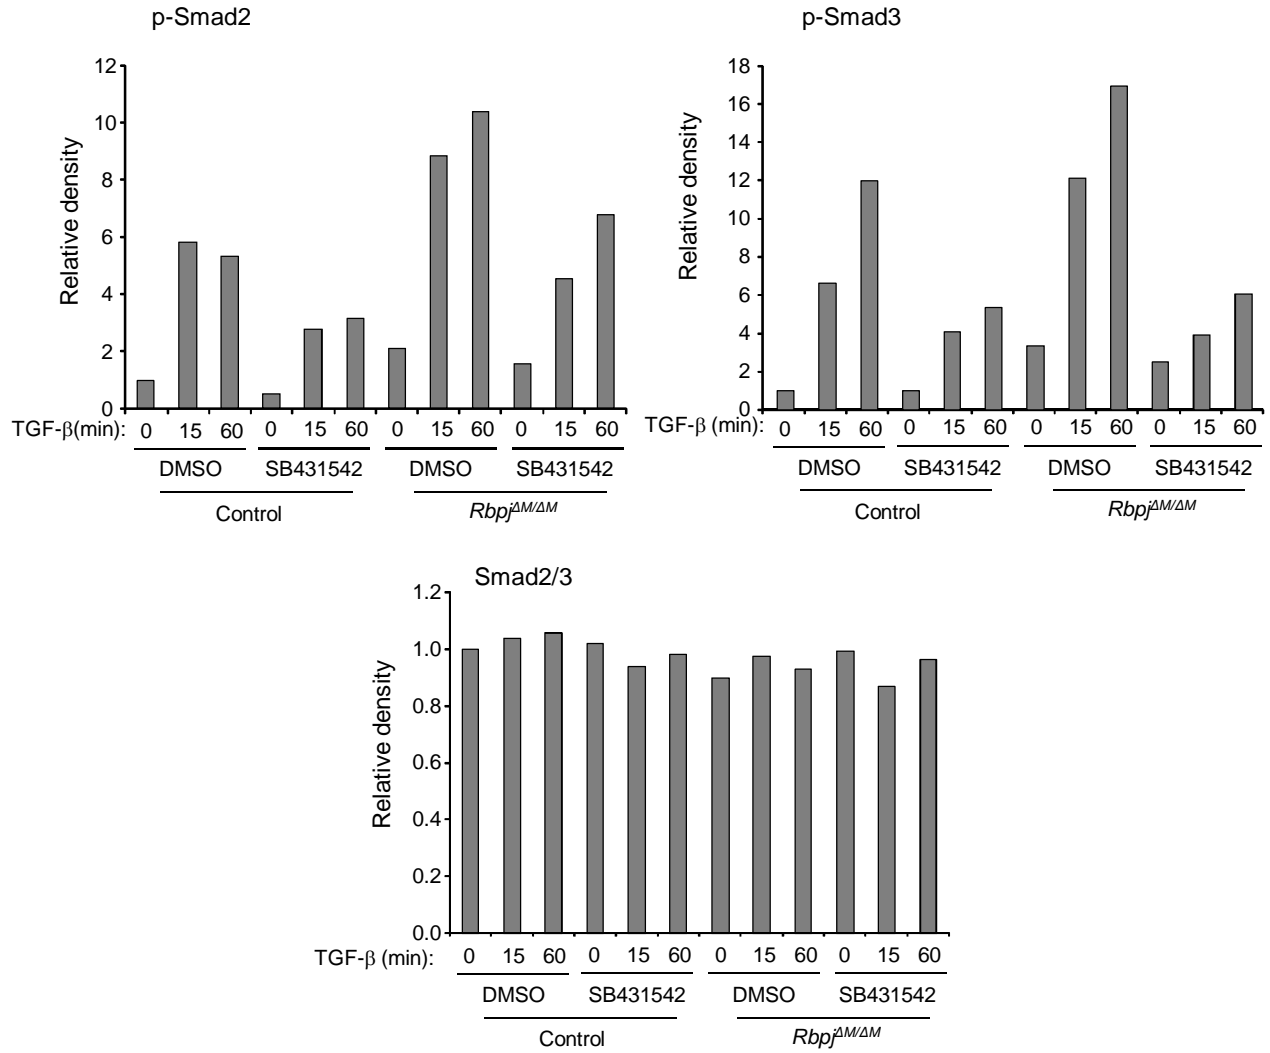

**Supplementary Figure 8** The relative density of the immunoblot bands of phospho-Smad2, phospho-Smad3, or total Smad2/3 vs. those of loading control  $\beta$ -tubulin in Figure 5B were quantified by densitometry and normalized to the basal control condition.



Supplementary Fig. 9 (Li *et al.*)

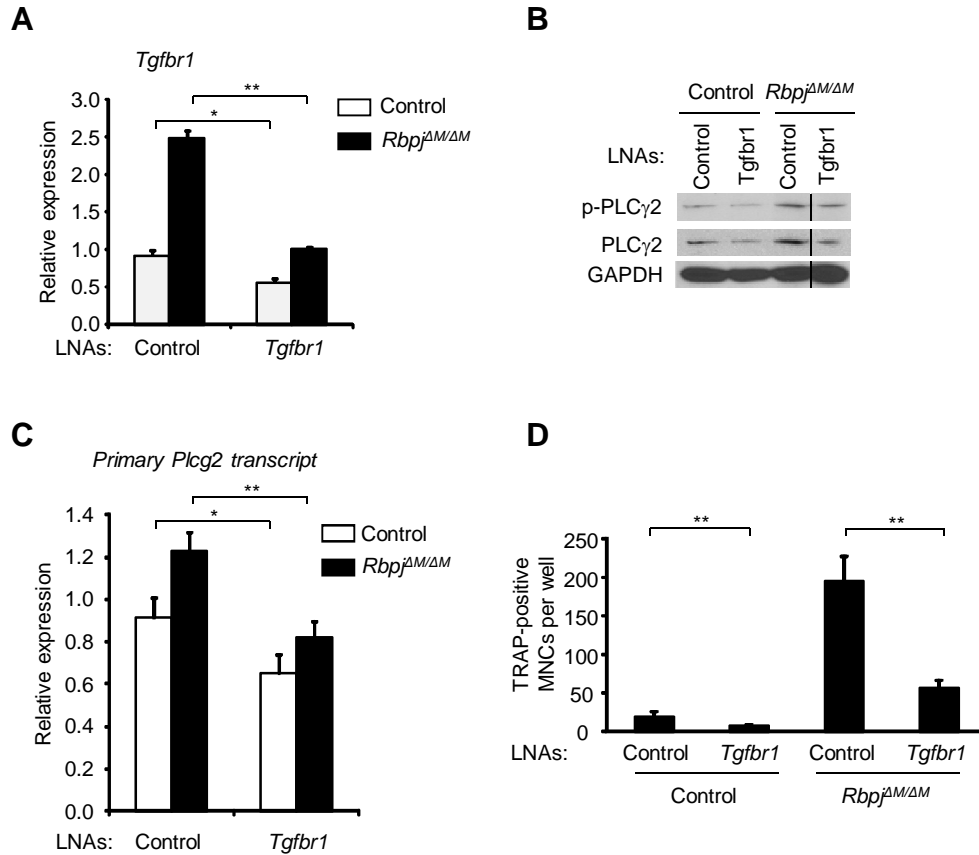

**Supplementary Figure 9 RBP-J deficiency suppresses PLC $\gamma$ 2 expression via a TGF- $\beta$  dependent pathway.** (A) Knockdown of *Tgfbr1* in the BMM cells transfected with the indicated LNAs for 24 hours. (B) Immunoblot analysis of phospho-PLC $\gamma$ 2 and total PLC $\gamma$ 2 (The lanes separated by a black line indicate that they were run on the same gel but were noncontiguous), and (C) Primary *Plcg2* transcript expression in BMMs transfected with indicated LNAs for 24 hours. (D) Quantification of TRAP-positive MNCs ( $\geq 3$  nuclei per cell) in the culture of BMMs transfected with the indicated LNAs for 24 hours followed by TNF- $\alpha$  treatment for 4 days. \* $P < 0.05$ ; \*\* $P < 0.01$ .

Supplementary Fig. 10 (Li *et al.*)

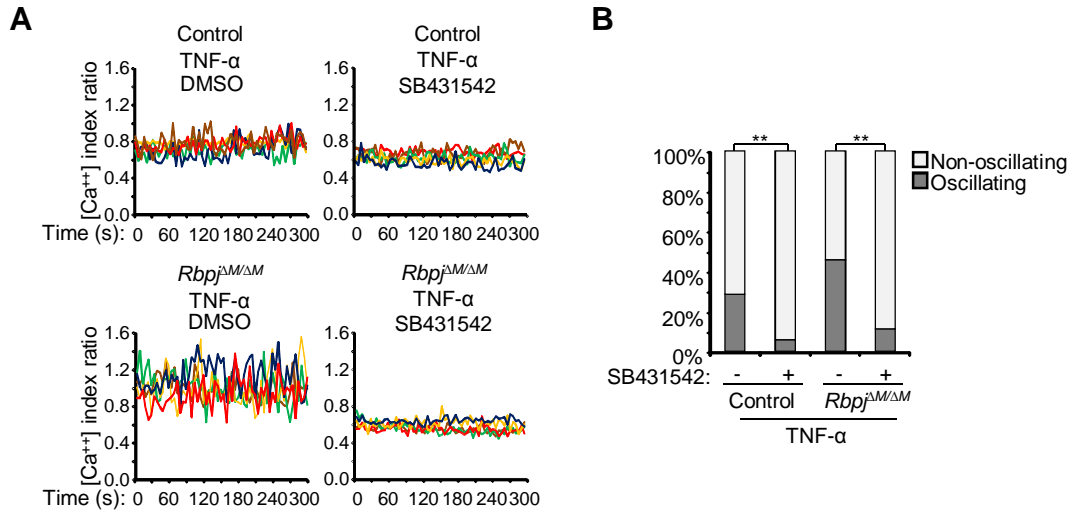

**Supplementary Figure 10 Inhibition of TGF- $\beta$  signaling dampens the TNF- $\alpha$ -enhanced calcium oscillation in the *Rbpj<sup>ΔM/ΔM</sup>* Cells.** (A) Representative calcium oscillatory traces of cells treated with TNF- $\alpha$  in the presence of SB431542 (100 $\mu$ M) or DMSO for 24 hours, and oscillating cells were quantified in (B). \*\* $P < 0.01$ .

Supplementary Fig. 11 (Li *et al.*)

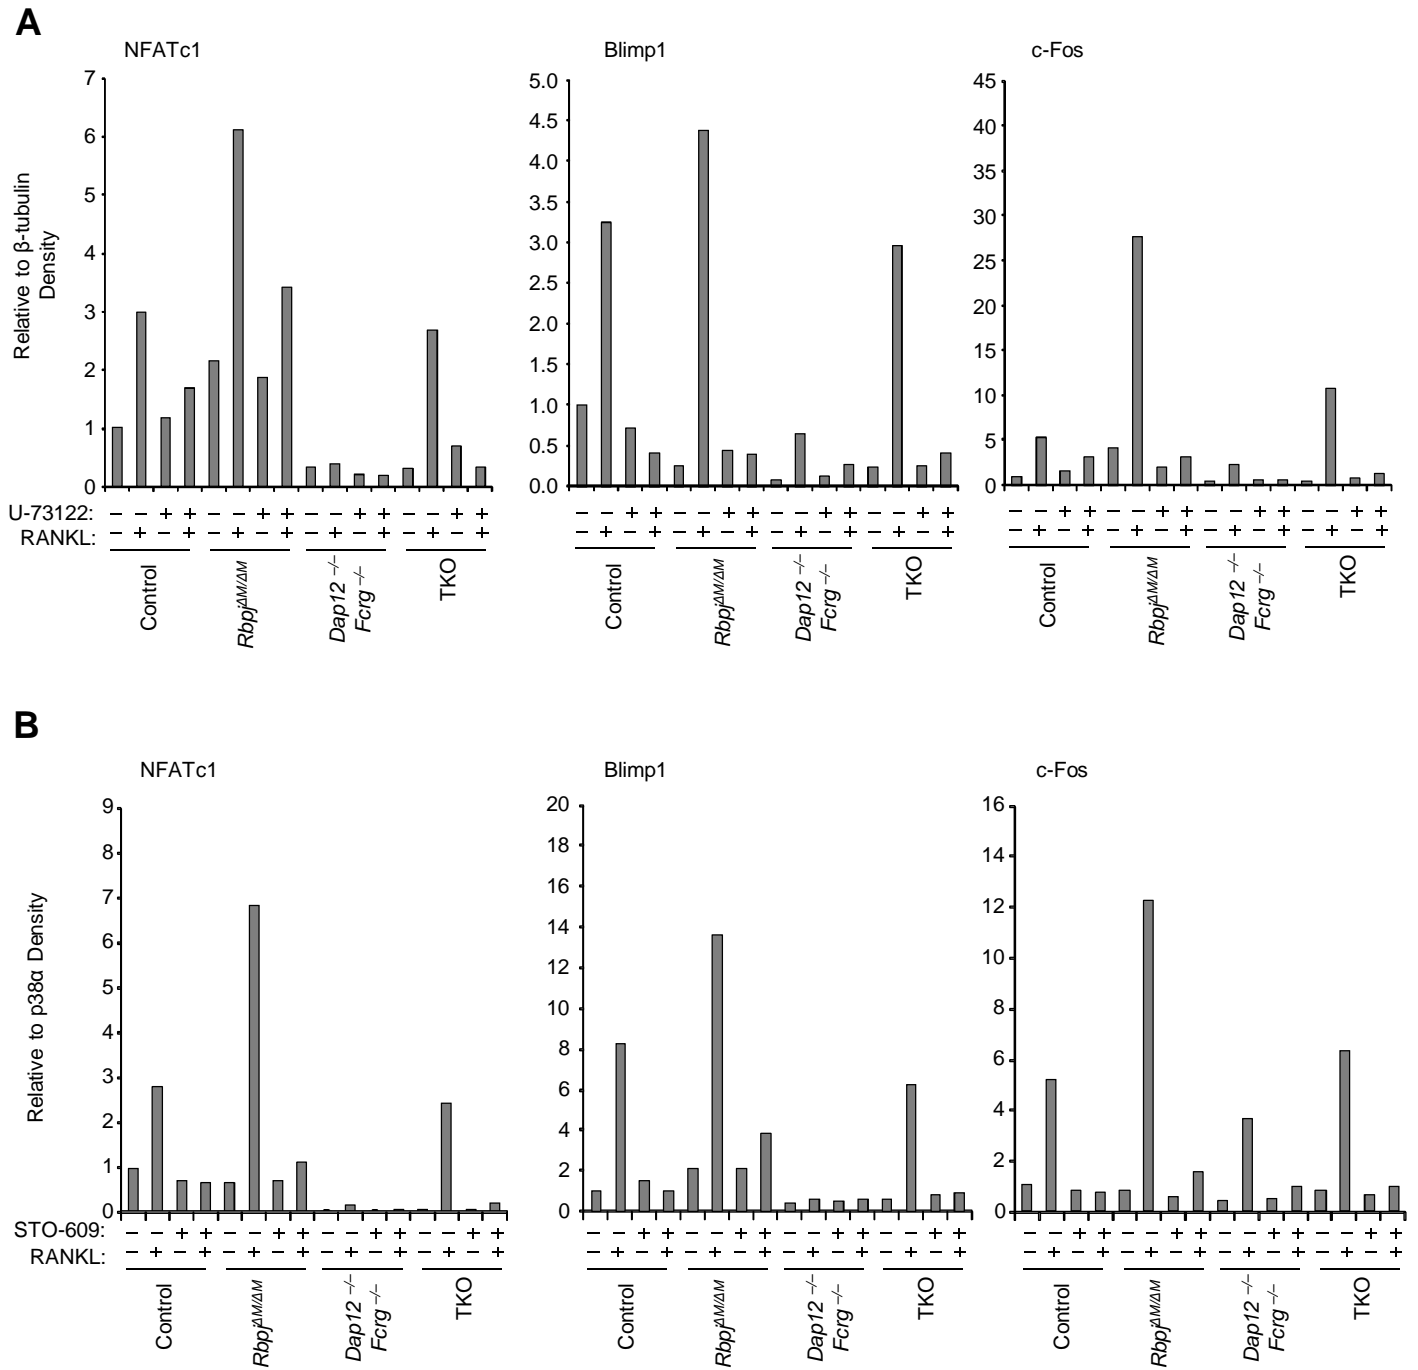

**Supplementary Figure 11** The relative density of the immunoblot bands of NFATc1, Blimp1 and c-Fos vs. those of loading control  $\beta$ -tubulin (A, corresponding to Fig. 6A) or p38 $\alpha$  (B, corresponding to Fig. 6C) were quantified by densitometry and normalized to each basal control condition.

Supplementary Fig. 12 (Li *et al.*)

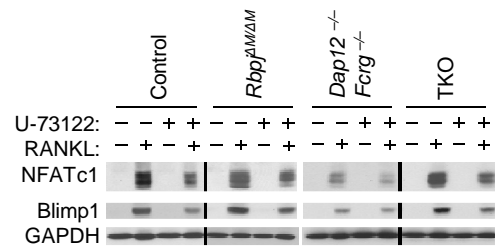

**Supplementary Figure 12** Immunoblot analysis of NFATc1 expression in the indicated BMM cells treated without or with RANKL for two days. The cells were pretreated for 30 min with PLC $\gamma$ 2 inhibitor U-73122 (10  $\mu$ M) or its vehicle ethanol that were completely washed away before addition of RANKL. The lanes separated by a black line indicate that they were run on the same gel but were noncontiguous. GAPDH was measured as a loading control.

Supplementary Fig. 13 (Li *et al.*)

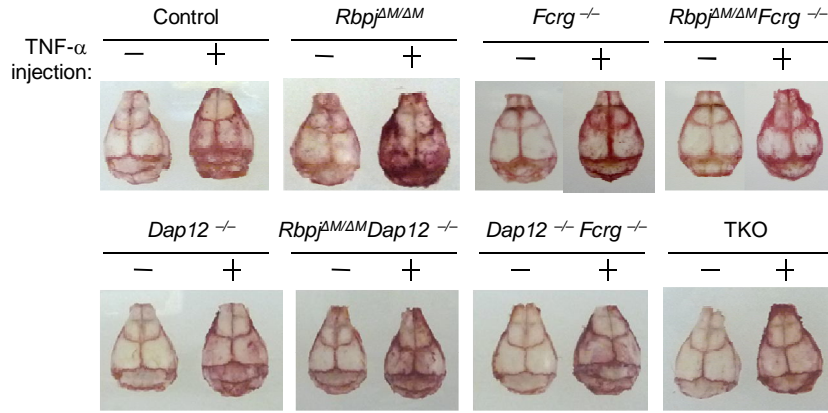

Supplementary Figure 13 TRAP staining of mouse whole calvaria after administration of TNF- $\alpha$  (75  $\mu$ g/kg body weight) daily to the calvarial periosteum of mice for five consecutive days. Scale bar, 1cm.

Supplementary Fig. 14 (Li *et al.*)

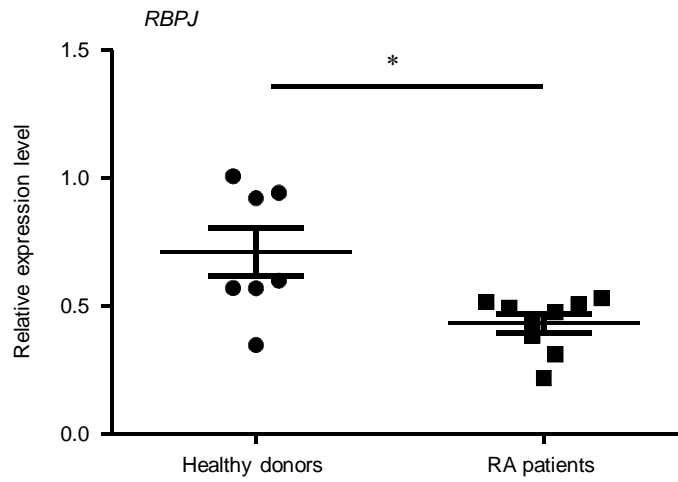

**Supplementary Figure 14** The mRNA expression levels of RBP-J are significantly lower in synovial fluid macrophages obtained from 9 rheumatoid arthritis (RA) patients than those in peripheral monocyte derived macrophages from 7 healthy donors. \* $P < 0.05$ .

Supplementary Fig. 15 (Li *et al.*)

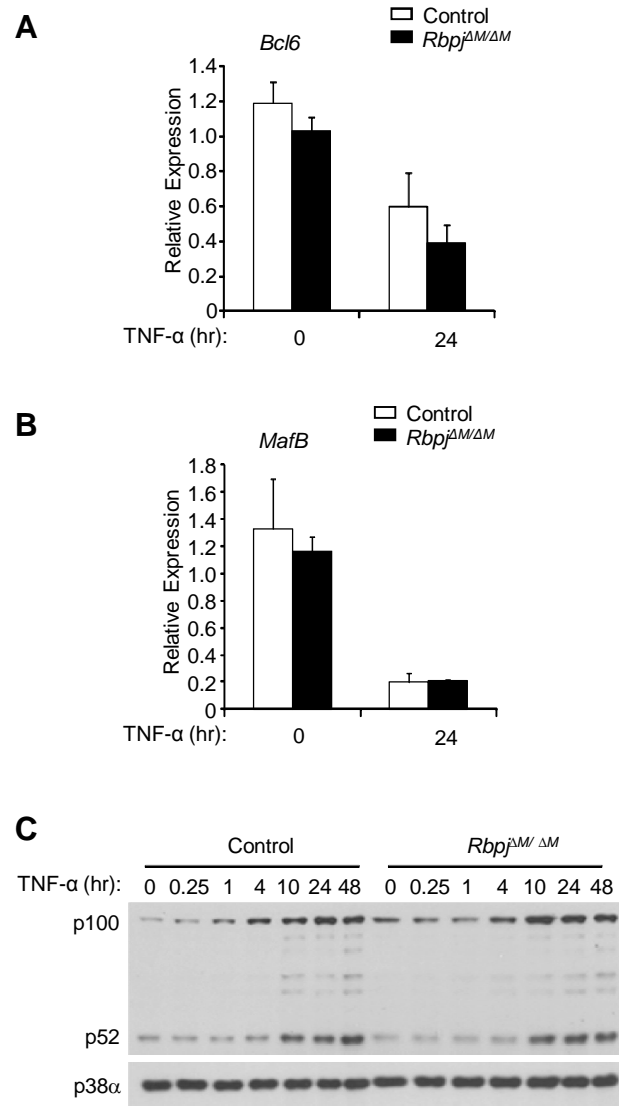

**Supplementary Figure 15 Expression of Bcl6, MafB and p100/p52 in response to TNF- $\alpha$  was not affected by RBP-J deficiency.** Quantitative real-time PCR analysis of mRNA expression level of Bcl6 (A) and MafB (B). (C) Immunoblot analysis of p100/p52 expression in response to TNF- $\alpha$  at the indicated times. p38 $\alpha$  was measured as a loading control.

Supplementary Fig. 16 (Li *et al.*)

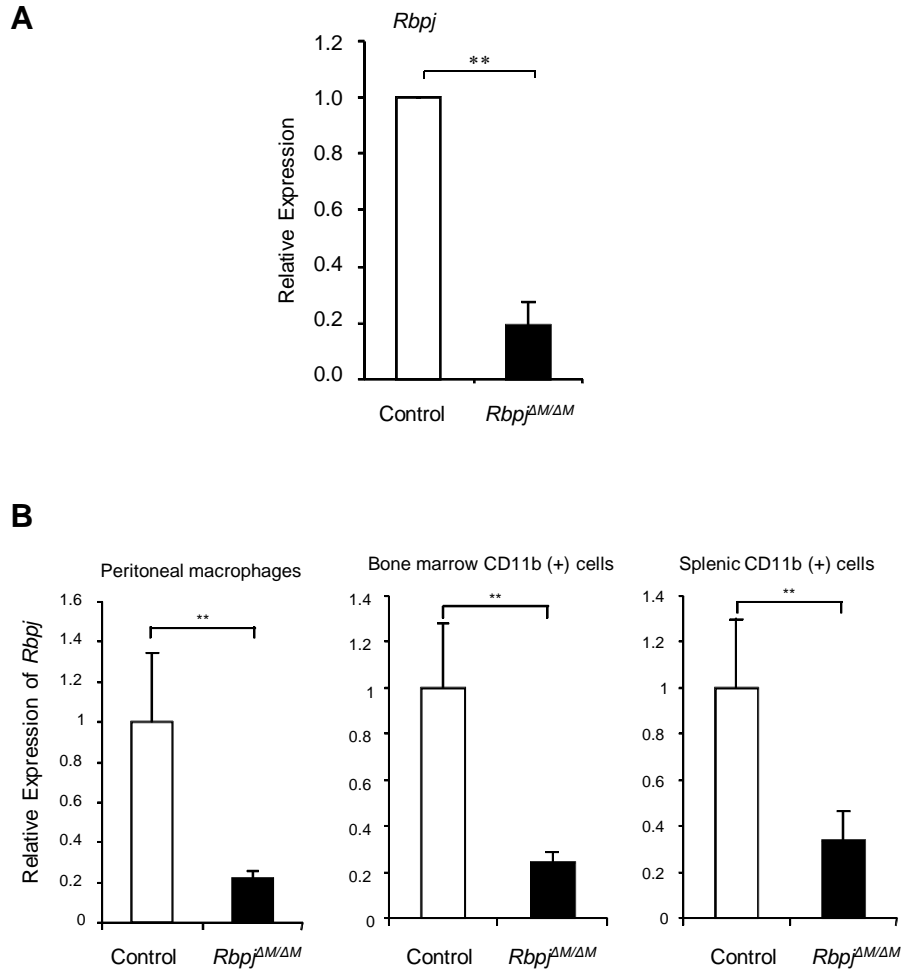

**Supplementary Figure 16 The extent of RBP-J deletion efficiency by LysM Cre.** (A) The extent of *Rbpj* deletion in bone marrow derived macrophages (BMMs) measured by real-time PCR. n=8 per group. (B) The extent of *Rbpj* in vivo deletion in *Rbpj*<sup>ΔM/ΔM</sup> mice. Myeloid cells from peritoneum, bone marrow or spleen were obtained by adherence or CD11b magnetic bead selection (Miltenyi Biotec) and RBP-J expression level in these cells was measured by real-time PCR. n=5 per group. \*\**p*<0.01.
